# Supplementary material for: NiCo2S4 nanotube arrays grown on flexible nitrogen-doped carbon foams as three-dimensional binder-free integrated anodes for high-performance lithium-ion batteries
Source: Royal Society of Chemistry journal article supplement (doi:10.1039/c5cp07541f), 2016-01-01
Supplement: c5cp07541f1.pdf [file c5cp07541f1.pdf]

## Supporting Information

### **NiCo<sub>2</sub>S<sub>4</sub> nanotube arrays grown on flexible nitrogen-doped carbon foams as three- dimensional binder-free integrated anodes for high-performance lithium-ion batteries**

Xiaoyu Wu, Songmei Li\*, Bo Wang, Jianhua Liu, Mei Yu

*Key Laboratory of Aerospace Advanced Materials and Performance of Ministry of  
Education, School of Materials Science and Engineering, Beihang University, Beijing,  
100191, P. R. China*

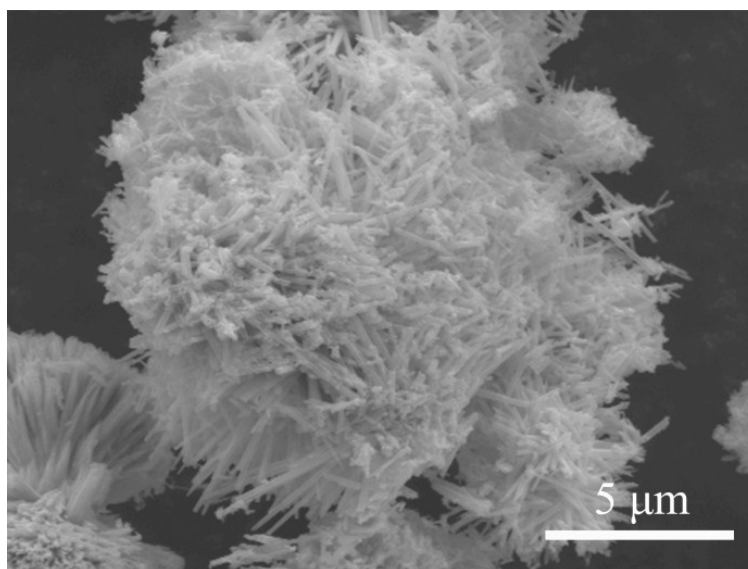

**Fig. S1** Typical SEM image of NiCo<sub>2</sub>S<sub>4</sub> powders prepared without the use of NDCF substrates.

---

\* Corresponding author. Tel: +86 10 82317103; fax: +86 10 82317103.  
E-mail address: songmei\_li@buaa.edu.cn.

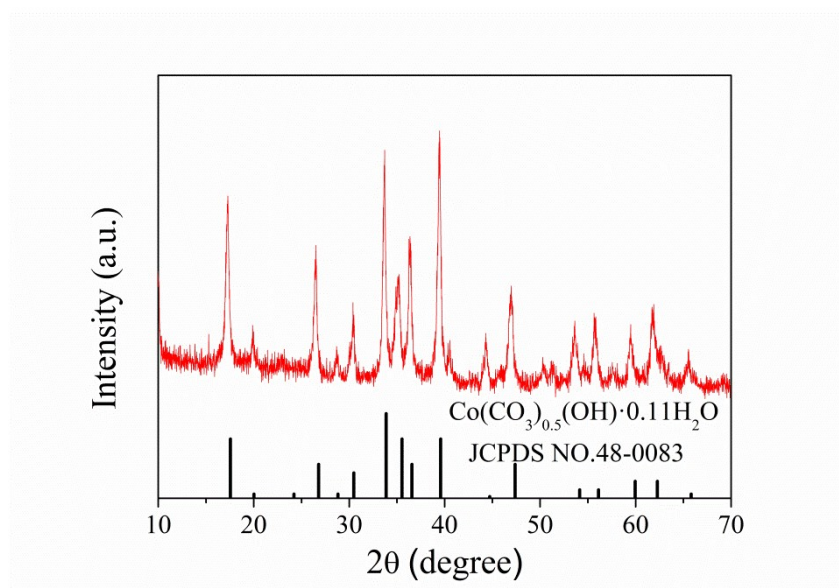

**Fig. S2** XRD pattern of the NiCo-precursors scratched from the NDCF.

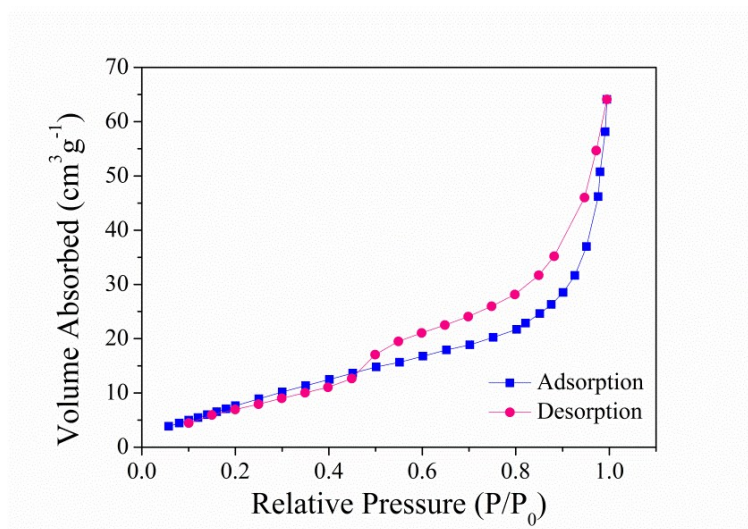

**Fig. S3** N<sub>2</sub> adsorption-desorption isotherms of the NiCo<sub>2</sub>S<sub>4</sub>/NDCF composites.

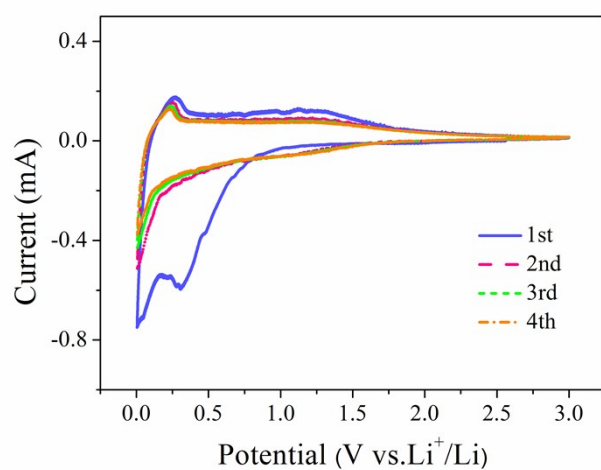

**Fig. S4** CV curves of the pure NDCF electrode for the initial four cycles at a scan rate of  $0.1 \text{ mV s}^{-1}$  in the voltage range of 0.005-3.0 V.
